# Supplementary material
Source: PubMed Central journal article supplement (PMC3262880)
Supplement: NIHMS342398-supplement-1.pdf [file NIHMS342398-supplement-1.pdf]

## DATA SUPPLEMENT

### **The neuroimmune guidance cue netrin-1 promotes atherosclerosis by inhibiting macrophage emigration from plaques**

Janine M van Gils, Merran C Derby, Luciana R Fernandes, Bhamu Ramkhelawon, Tathagat D Ray,  
Katey J Rayner, Sajesh Parathath, Emilie Distel, Jessica L Feig, Jacqueline I Alvarez-Leite, Alistair J  
Rayner, Thomas O McDonald, Kevin D O'Brien, Lynda M Stuart, Edward A Fisher, Adam Lacy-Hulbert  
and Kathryn J Moore

## SUPPLEMENTARY TABLES

**Supplementary Table 1.** Metabolic parameters of *WT* → *Ldlr*<sup>-/-</sup> and *Ntn1*<sup>-/-</sup> → *Ldlr*<sup>-/-</sup> chimeric mice fed a Western diet for 12 weeks.

|                                  | <i>WT</i> → <i>Ldlr</i> <sup>-/-</sup> |      | <i>Ntn1</i> <sup>-/-</sup> → <i>Ldlr</i> <sup>-/-</sup> |      |
|----------------------------------|----------------------------------------|------|---------------------------------------------------------|------|
| <b>Weight (g)</b>                | 20.7 (±0.90)                           | n=9  | 20.2 (±1.50)                                            | n=14 |
| <b>Total cholesterol (mg/dl)</b> | 716 (±195)                             | n=10 | 738 (±138)                                              | n=14 |
| <b>Triglycerides (mg/dl)</b>     | 869 (±365)                             | n=9  | 936 (±588)                                              | n=12 |
| <b>Reconstitution (%)*</b>       | 99.7 (±0.20)                           | n=10 | 97.9 (±3.50)                                            | n=10 |

\* Analyzed by *Ldlr* WT and KO gene expression in blood leukocytes.

**Supplementary Table 2.** PCR Primer sequences.

|                                       | <b>Forward (5' – 3')</b>     | <b>Reverse (3' – 5')</b>   |
|---------------------------------------|------------------------------|----------------------------|
| <b>Human ACTB</b>                     | TGCTATCCCTGTACGCCTCT         | CCATCTCTTGCTCGAAGTCC       |
| <b>Human DCC</b>                      | CGACCGAGGAGTTCCAGTGATCAAG    | GGTTCTTCTGCCAGTGGATTGTTGG  |
| <b>Human NEOGENIN</b>                 | ACCCAGCCTGTGATTAGTG          | TGTGATGGTTCAGAGCTTGC       |
| <b>Human UNC5b</b>                    | CAGCCTTAAGGTCAAGGTCTACAGCTC  | GTGACTGGATCTTTCAGCTCAAGACC |
| <b>Mouse <i>Abca1</i></b>             | GGTTTGGAGATGGTTATACAATAGTTGT | CCCGGAAACGCAAGTCC          |
| <b>Mouse <i>Cd3</i></b>               | ATCGCCTGGAACACTTTCTGG        | GCACGTCAACTCTACACTGGT      |
| <b>Mouse <i>Cd11c</i></b>             | GCAGGAGTGTCCAAAGCAAGA        | CGTGTGCTAGGTCTCTGAAGC      |
| <b>Mouse <i>Cd68</i></b>              | TGTCTGATCTTGCTAGGACCG        | GAGAGTAACGGCCTTTTTGTGA     |
| <b>Mouse <i>Gapdh</i></b>             | TGTGAGGGAGATGCTCAGTG         | TGTTCTACCCCAATGTGT         |
| <b>Mouse <i>Ldlr</i> (KO)</b>         | CCATATGCATCCCCAGTCTT         | AATCCATCTTGTTCAATGGCCGATC  |
| <b>Mouse <i>Ldlr</i> (WT)</b>         | CCATATGCATCCCCAGTCTT         | GCGATGGATACACTCACTGC       |
| <b>Mouse <i>Ntn1</i></b>              | GCGGGTTATTGAGGTCCGGTG        | CAGCCTGATCCTTGCTCGG        |
| <b>Mouse <i>Elastase</i></b>          | TTGCCAGGAATTCGTCATGT         | TGTGAGGGAGATGCTCAGTG       |
| <b>Mouse <i>Unc5b</i></b>             | TGGATCTTTCAGCTCAAGACCCAG     | AAGATGGCCAGCTGGAGCCG       |
| <b>Mouse <i>Ntn1</i> (Taqman)</b>     | GCAAGCCCTTCCACTACGAC         | CGCGAGCTCCATGTTGAATCTGC    |
| <b>Mouse <i>Ntn1</i> Taqman probe</b> | GAGGCCAACGAGTGCG             |                            |

## SUPPLEMENTARY FIGURES

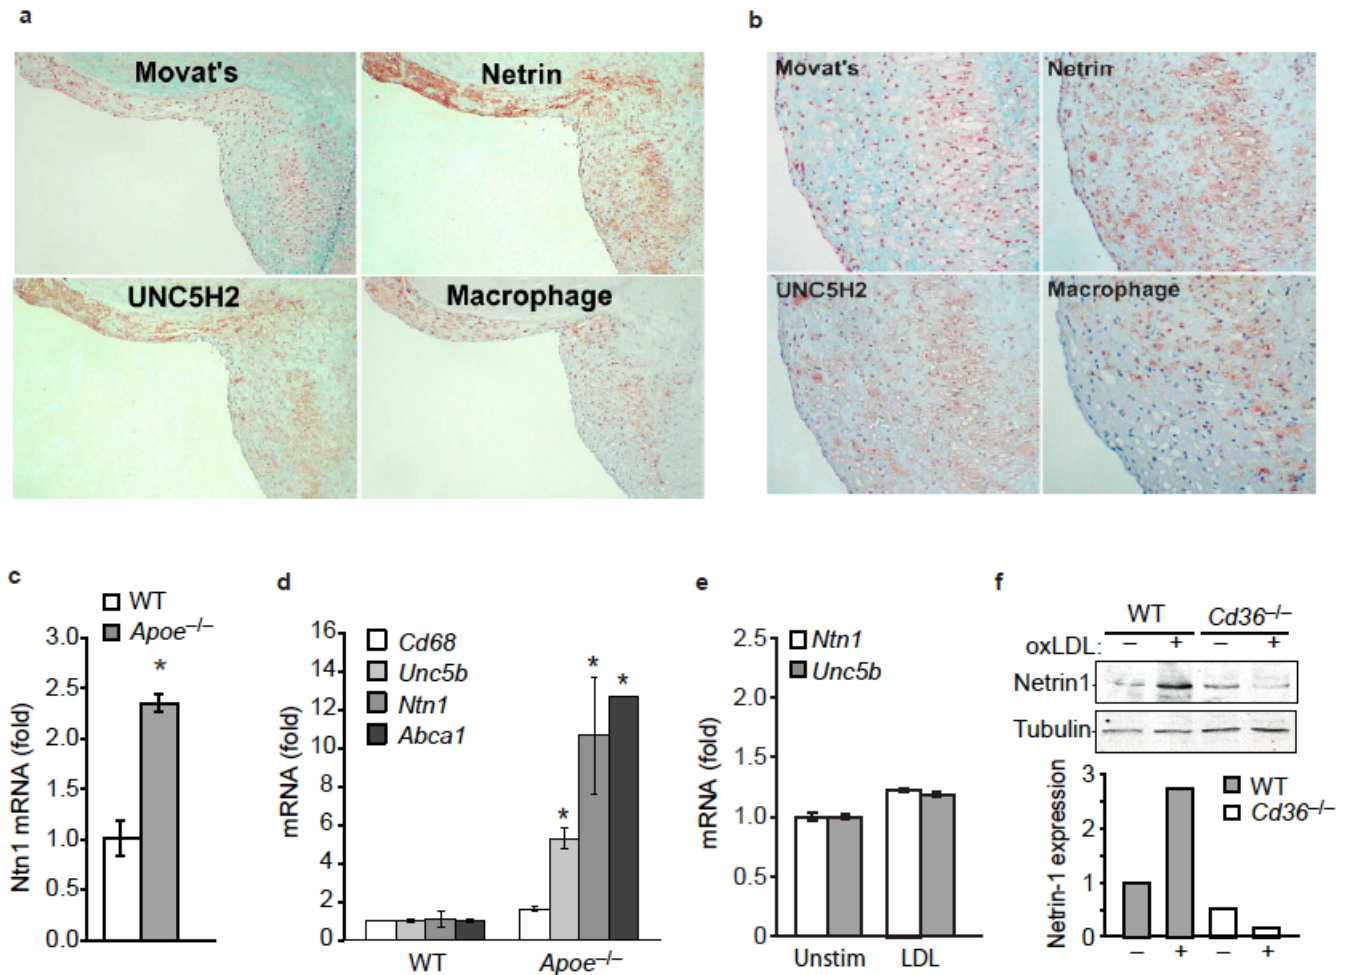

**Supplementary Figure 1. Netrin-1 and its receptor UNC5b are expressed in human and *Apoe*<sup>-/-</sup> mouse atherosclerotic plaques.** (a-b) Immunohistochemical staining for netrin-1, UNC5H2 (UNC5b) and macrophages (HAM56) in serial sections of a human atherosclerotic plaque from the left anterior descending coronary artery, also stained with Movat's pentachrome stain to show histological features of the plaque. Staining is representative of plaques from 3 individuals (original Mag (a) x20, (b) x 200). (c) qPCR analysis of *Ntn1* mRNA isolated from the aortic arch of C57BL/6 or *Apoe*<sup>-/-</sup> mice fed a chow diet for 6 months. (d) qPCR analysis of *Ntn1* and *Unc5b* mRNA in peritoneal macrophages isolated from C57BL/6 or *Apoe*<sup>-/-</sup> mice fed chow for 6 months. Expression of the macrophage marker *Cd68* and the cholesterol responsive gene *Abca1* were measured as controls. (e) qPCR analysis of *Ntn1* and *Unc5b* mRNA in peritoneal macrophages treated with 50 µg/ml LDL (6 h). (f) Immunoblot of netrin-1 protein in WT or *Cd36*<sup>-/-</sup> macrophages stimulated with oxLDL (50 µg/ml, 48 h). Data are mean ± s.d. of triplicate samples in a single experiment and are representative of 3 independent experiments. \*P<0.05.

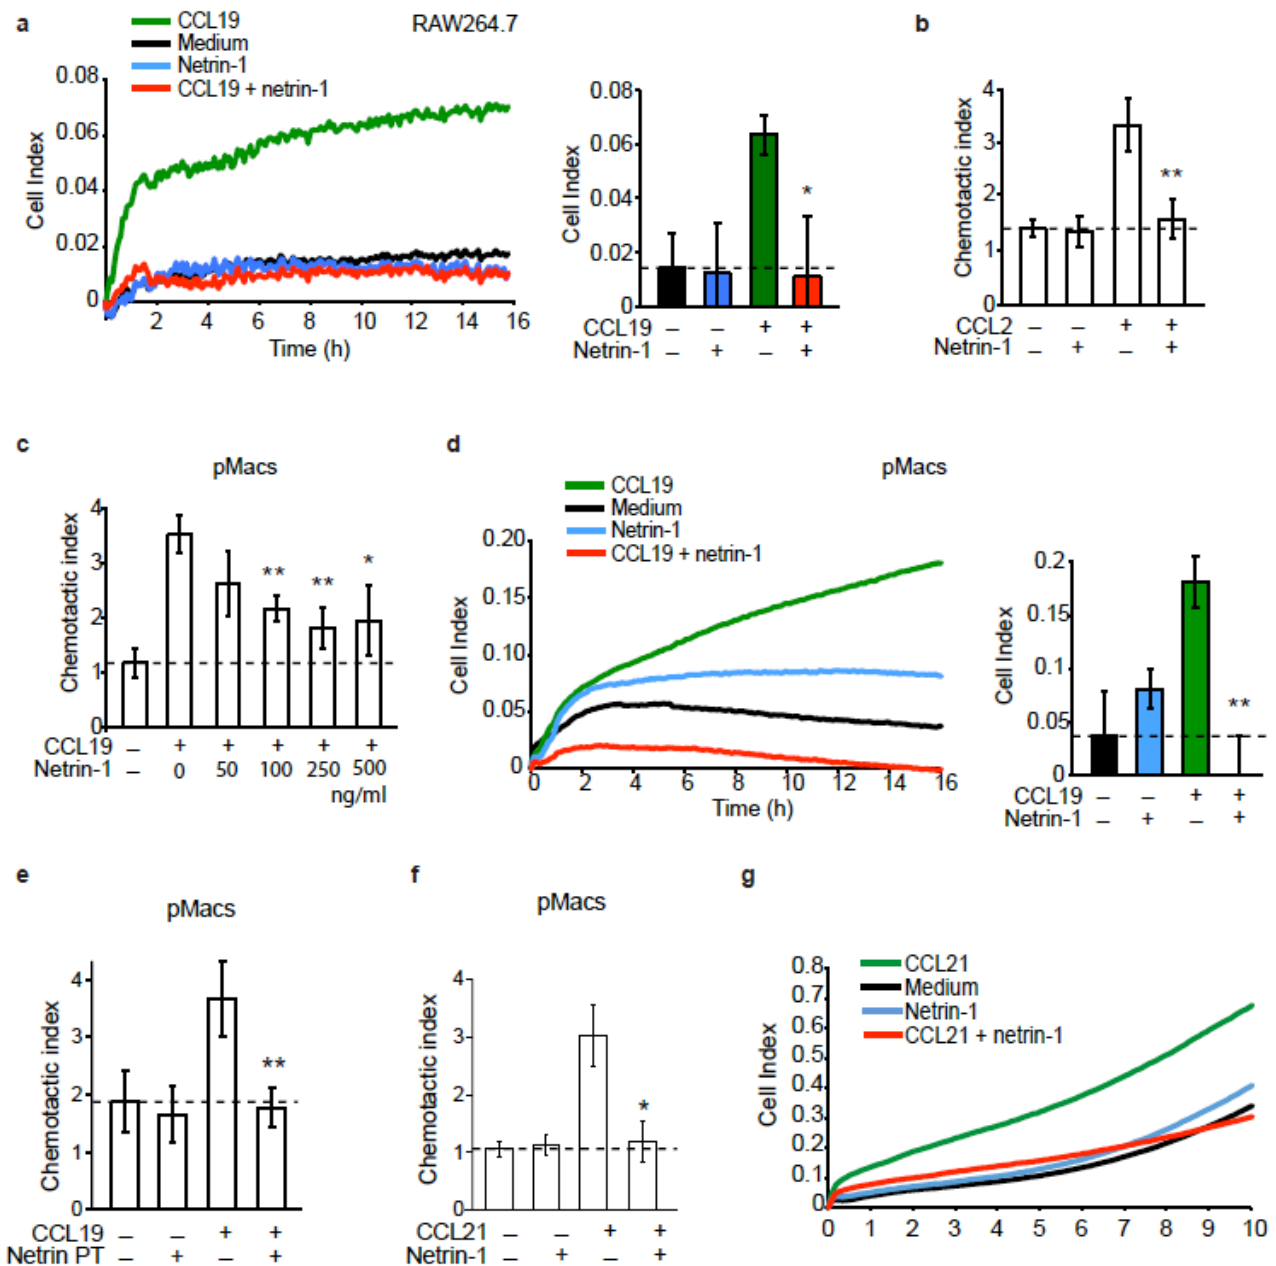

**Supplementary Figure 2. Netrin-1 inhibits macrophage migration to CCL2 and CCL19.**

(a) Measurement of RAW264.7 cell migration to 250 ng/ml netrin-1, 500 ng/ml CCL19, or both, using the Real-time Cell Invasion and Migration xCelligence system. Graph at right shows the mean cell index  $\pm$  s.d. of triplicate samples at 16 h. (b) Migration of RAW264.7 cells to 250 ng/ml netrin-1, 100 ng/ml CCL2, or both as measured by Boyden chamber assay. (c) Migration of pM $\phi$  to CCL19 (500 ng/ml) in the presence of increasing concentrations of recombinant netrin-1. (d) Real time measurement of pM $\phi$  migration to 250 ng/ml netrin-1, 500 ng/ml CCL19, or both. Graph at right shows the mean cell index  $\pm$  s.d. of triplicate samples at the 16 h endpoint. (e) Migration of pM $\phi$  pretreated (PT) with 250 ng/ml netrin-1 for 1 hour and washed 3x prior to exposure to CCL19 (500 ng/ml). (f) Migration of mouse peritoneal macrophages to 250 ng/ml netrin-1, 500 ng/ml CCL21, or both as measured by Boyden chamber assay. (g) Real time measurement of macrophage migration to 250 ng/ml netrin-1, 500 ng/ml CCL21, or both. (a-f) Data are mean  $\pm$  s.d. of triplicate samples in a single experiment and are representative of  $\geq 3$  independent experiments. \*P<0.05, \*\*P<0.01.

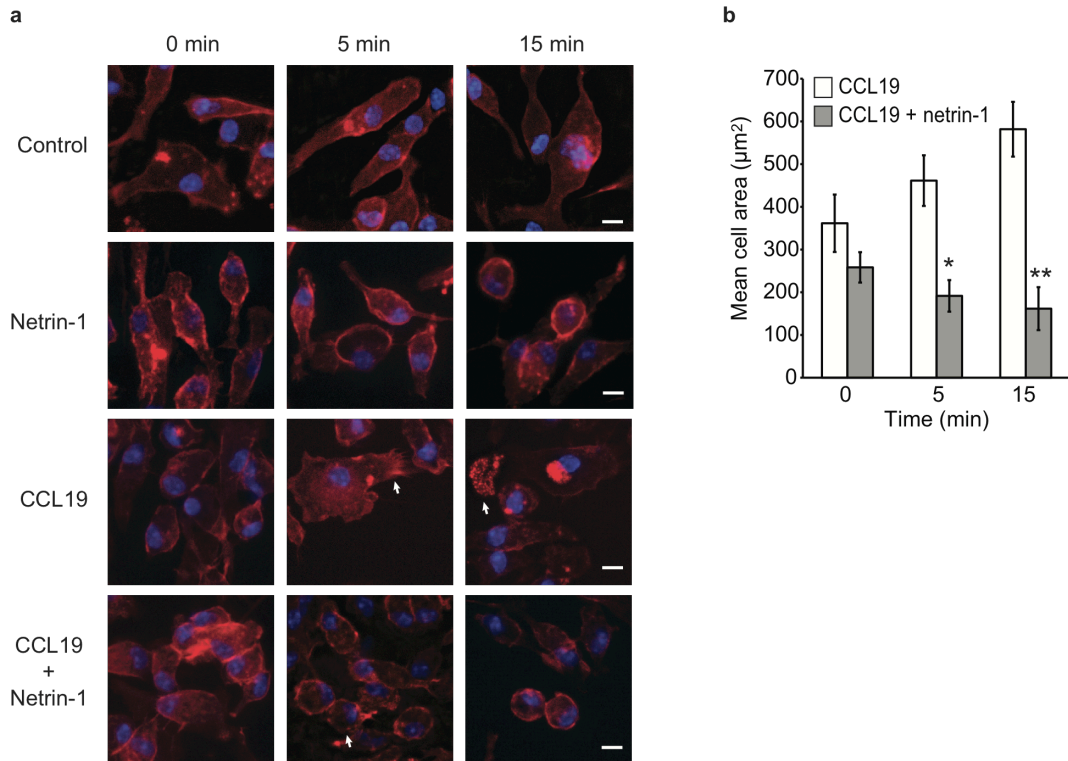

**Supplementary Figure 3.** Mouse peritoneal macrophages were incubated with 500 ng/ml CCL19 with/without 250 ng/ml netrin-1 pretreatment. After the indicated times the cells were fixed, permeabilized and stained with phalloidin to detect polymerized actin. **(a)** Cell morphology was analyzed with fluorescence microscopy and arrows indicate membrane ruffles. Scale bar, 10 µm. **(b)** mean surface area of cells in (a). Data are the mean of 5 high power fields ± s.d. \*P<0.05.

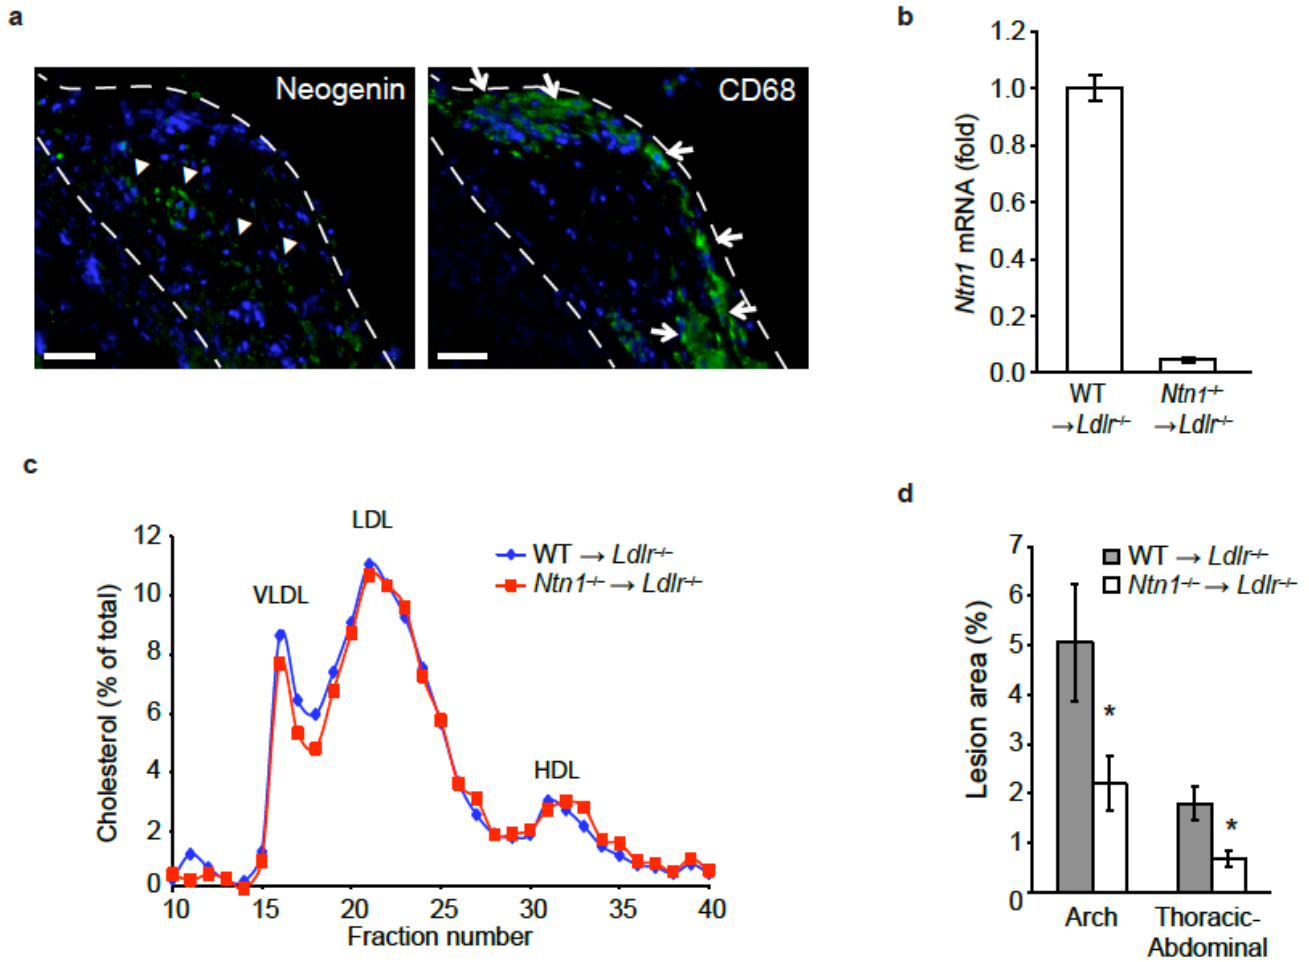

**Supplementary Figure 4.** (a) Immunofluorescent staining of neogenin (left, green) or CD68 (right, green) and DAPI (blue) in serial sections of atherosclerotic plaques of *Ldlr*<sup>-/-</sup> mice fed a Western diet. Arrowheads indicate neogenin staining in lesion areas distinct from CD68<sup>+</sup> regions, indicated by arrows. Scale bar, 50  $\mu$ m. (b) qPCR analysis of *Ntn1* mRNA in M $\phi$  of *WT*  $\rightarrow$  *Ldlr*<sup>-/-</sup> and *Ntn1*<sup>+/-</sup>  $\rightarrow$  *Ldlr*<sup>-/-</sup> chimeric mice. (c) FPLC fractionation of pooled plasma from *WT*  $\rightarrow$  *Ldlr*<sup>-/-</sup> and *Ntn1*<sup>+/-</sup>  $\rightarrow$  *Ldlr*<sup>-/-</sup> chimeric mice (n=3/group) fed a Western diet for 12 weeks. (d) Regional analysis of lesion distribution in the en face aorta of *WT*  $\rightarrow$  *Ldlr*<sup>-/-</sup> and *Ntn1*<sup>+/-</sup>  $\rightarrow$  *Ldlr*<sup>-/-</sup> chimeric mice fed a Western diet for 12 weeks (n=10/group). Data are expressed as mean % lesion area  $\pm$  s.e.m. \*P<0.05.
